# Supplementary material
Source: MDPI journal article supplement (https://www.mdpi.com/2036-7449/14/1/1)
Supplement: s1 [file s1]

**Table S1:** Summary of Reported HCV Treatment Barriers and Facilitators among a Sample of Pregnant/Early Parenting Mothers in SUD Treatment

| Category                          | Themes                                                                                                                                                                                                                                                                                                                                                                                |
|-----------------------------------|---------------------------------------------------------------------------------------------------------------------------------------------------------------------------------------------------------------------------------------------------------------------------------------------------------------------------------------------------------------------------------------|
| Barriers to treatment uptake      | <ul style="list-style-type: none"> <li>• Low priority for treatment due to other life circumstances</li> <li>• Uncertain/ misinformed about: <ul style="list-style-type: none"> <li>○ Treatment eligibility</li> <li>○ Treatment duration and/or side effects</li> </ul> </li> <li>• Active/ongoing substance use</li> <li>• Perceived complexity of the treatment process</li> </ul> |
| Facilitators of treatment uptake* | <ul style="list-style-type: none"> <li>• Provision of information by healthcare providers</li> <li>• Support to initiate and complete treatment: <ul style="list-style-type: none"> <li>○ Logistic support</li> <li>○ Financial support</li> </ul> </li> </ul>                                                                                                                        |

\*Given the low prevalence of treatment uptake among our study population, facilitators of treatment uptake could only be explored hypothetically.
